# Supplementary material for: In situ formation of polymer electrolytes using a dicationic imidazolium cross-linker for high-performance lithium ion batteries
Source: Royal Society of Chemistry journal article supplement (doi:10.1039/d0ta09249e), 2021-01-01
Supplement: d0ta09249e1.pdf [file d0ta09249e1.pdf]

# **In-Situ Formation of Polymer Electrolytes Using a Dicationic Imidazolium Cross-linker for High-Performance Lithium Ion Batteries**

*Yu-Chao Tseng<sup>a,b</sup>, Shih-Hsien Hsiang<sup>a,b</sup>, Chih-Hao Tsao<sup>a,c</sup>, Hsisheng Teng<sup>a,b,\*</sup>, Sheng-Shu Hou<sup>a,b,\*</sup> and  
Jeng-Shiung Jan<sup>a,b,\*</sup>*

<sup>a</sup>Department of Chemical Engineering, National Cheng Kung University, Tainan 70101, Taiwan

<sup>b</sup>Hierarchical Green-Energy Materials (Hi-GEM) Research Center, National Cheng Kung University, Tainan  
70101, Taiwan

<sup>c</sup>Rising Chemical Ltd. Co., Xiaogang Dist., Kaohsiung, 81264, Taiwan

\*Correspondence: Hsisheng Teng, Department of Chemical Engineering, National Cheng Kung University, No. 1 University  
Road, Tainan City 701, Taiwan, E-mail: hteng@mail.ncku.edu.tw, Phone: 886-6-275-7575 ext 62640, Fax: 886-6-234-4496.;

Sheng-Shu Hou, Department of Chemical Engineering, National Cheng Kung University, No. 1 University Road, Tainan City 701,  
Taiwan, E-mail: sshou@mail.ncku.edu.tw, Phone: 886-6-275-7575 ext 62641, Fax: 886-6-234-4496.; Jeng-Shiung Jan,

Department of Chemical Engineering, National Cheng Kung University, No. 1 University Road, Tainan City 701, Taiwan, E-mail:  
[jsjan@mail.ncku.edu.tw](mailto:jsjan@mail.ncku.edu.tw), Phone: 886-6-275-7575 ext 62660, Fax: 886-6-234-4496.

## 20 Experiments

### 21 Materials

22 1-vinylimidazole, bromoethane and 1,4-diiodobutane were supplied from Alfa Aesar. Poly(ethylene  
23 glycol) methyl ether methacrylate (PEGMEA) ( $M_n = 500$  g/mol), poly(ethylene glycol) dimethyl ether  
24 (PEGDME) ( $M_n = 500$  g/mol), sodium sulfate, polyvinylidene difluoride (PVDF) and  
25 2,2'-azobis(2-methylpropionitrile) (AIBN) were obtained from Sigma Aldrich. Charcoal activated was  
26 received from Tokyo Chemical Industry company. Lithium bis(trifluoromethylsulfonyl) (LiTFSI) was  
27 provided by Solvay and kept in the glove box. Lithium metal and aluminum foil were purchased from UBIQ  
28 company.  $\text{LiFePO}_4$  and super P were used as received from Timcal and Aleees, respectively. All the used  
29 solvents were ACS reagent grade.

### 30 Synthesis of prepolymers (VIm-TFSI and XVIm-TFSI)

31 VIm-TFSI was synthesized by refluxing a solution of 1-vinylimidazole (1 mmol) and bromoethane  
32 (1.2 mmol) in ethyl acetate overnight. The bromide intermediate was collected from the mixture at the end  
33 of the reaction. After stirring with ethyl acetate (3 times) to remove any unreacted impurity, the intermediate  
34 was then dissolved in water followed by adding excessive LiTFSI into the solution. The mixtures were  
35 stirred for another 5 hours. After the reaction, the clarify liquid precipitated was poured in ethyl acetate and  
36 extracted with water until the residual LiBr would not be detected by 0.1M  $\text{AgNO}_3$  aqueous solution. The  
37 combined organic layer was dried over sodium sulfate and purified by passing through charcoal activated.  
38 The solvent was then concentrated by rotary evaporation and dried under vacuum at 80 °C overnight to yield  
39 the desired prepolymer, VIm-TFSI. XVIm-TFSI was obtained via a similar procedure except the added

40 bromoethane was replaced by 1,4-diiodobutane, and the molar ratio between 1-vinylimidazole and  
41 1,4-diiodobutane was set as 1: 0.4. The synthesis procedure is illustrated in Figure S1.

## 42 **Electrolyte Preparation**

43 The electrolytes were prepared by in-situ polymerization. First, the mixtures with desired amount of  
44 VIm-TFSI or XViIm-TFSI/PEGMEA/LiTFSI/PEGDME were dissolved together in an argon filled glove box.  
45 The weight ratio of prepolymer, LiTFSI and PEGDME was set as 5: 3: 4, while the weight percentage of  
46 VIm-TFSI or XViIm-TFSI was between 10 - 25 % based on the total prepolymer mass. P-10, for instance,  
47 was prepared as follows. VIm-TFSI (20 mg), PEGMEA (180 mg), LiTFSI (120 mg), PEGDME (160 mg)  
48 and AIBN (6 mg) were mixed for 3 hours to form a homogeneous solution, which was dropped on the  
49 lithium metal directly. Then the in-situ polymerization was performed upon a hot plate at 70 °C for 6 hours  
50 in the glovebox, a transparent electrolyte sticking to the lithium anode was thus obtained. Other products  
51 were prepared through the method same as that of P-10 only the contents of VIm-TFSI or XViIm-TFSI were  
52 modified to the corresponding values, and a control sample (P-0) without cationic segments was also  
53 synthesized for comparison. All electrolyte compositions were recorded in Table S1.

## 54 **Characterization**

55 <sup>1</sup>H nuclear magnetic resonance spectroscopy (<sup>1</sup>H NMR) was performed on a Bruker Avance 600NMR  
56 with dimethyl sulfoxide-d<sub>6</sub> as solvent. Fourier transform infrared spectroscopic (FT-IR) measurement was  
57 conducted on a Thermo Nicolet Nexus 6700. The surface morphology of materials was probed through  
58 Hitachi SU8010 Field-Emission Scanning Electron Microscopy (FE-SEM) with an accelerating voltage of  
59 10 kV. The samples were mounted on a platform and sputtered with Pt for 3 mins before observations. X-ray  
60 diffraction (XRD) analysis was characterized by a Rigaku Ultima IV-9407F701 X-ray spectrometer with Cu

61 K $\alpha$  (0.154 nm) radiation operating at 50 kV and 250 mA. Thermogravimetric analysis (TGA) was  
62 conducted on a Perkin-Elmer TGA 4000 under a nitrogen atmosphere from 25 °C to 600 °C at the rate of 15  
63 °C min<sup>-1</sup>. The calorimetric measurement was run on a differential scanning calorimeter (DSC) with a TA  
64 Instruments Q100. Samples were sealed in aluminum pans and heated/cooled at a rate of 10 °C min<sup>-1</sup> under a  
65 nitrogen atmosphere. The elastic modulus of each sample was measured via the compression test using a  
66 dynamic mechanical analyzer (ARES G2) from 0 to 60 % strain at a rate of 0.01 mm s<sup>-1</sup>. The samples were  
67 cylindrical, with a 2: 1 ratio of diameter: thickness (10.0 mm: 5.0 mm). And the value of the compression  
68 modulus was calculated from the slope of the stress-strain plot.

69 Ionic conductivity measurements were conducted via AC impedance spectroscopy, using a CH  
70 Instruments 6116E at open circuit voltage in the frequency range of 10<sup>-1</sup> Hz to 10<sup>6</sup> Hz at temperatures from  
71 25 °C to 80 °C. A feeler gauge was used to measure the thickness (D) of the samples which were then  
72 sandwiched between two stainless steels for the measurement. An extrapolation was adopted based on the  
73 ten plots at the high frequency end and the x-axis value of the intersection was defined as the bulk resistance  
74 of the electrolyte (R). The ionic conductivity of electrolytes can thus be calculated through the following  
75 equation:

$$\sigma\left(\frac{\text{S}}{\text{cm}}\right) = \frac{D}{RA}$$

76 where R represents the obtained bulk resistance, D and A are the thickness (cm) of the electrolyte and the  
77 contact area (cm<sup>2</sup>) of the stainless steel/electrolyte, respectively. The electrochemical stability window of the  
78 electrolytes was studied by a linear sweep voltammetry (LSV) technique in a cell that sandwiched the  
79 sample between lithium metal and a stainless steel disk, in which the lithium metal was employed as the  
80 reference and counter electrode while the stainless steel was employed as the working electrode,

82 respectively (scan rate: 5 mV s<sup>-1</sup>). The interfacial compatibility between the electrolyte and lithium anode  
83 was evaluated through lithium plating/stripping cycling test using symmetrical lithium coin cells at the  
84 BAT-700 battery testing system. Charge-discharge cycling was performed at different current densities  
85 ranged from 50 μA cm<sup>-2</sup> to 300 μA cm<sup>-2</sup> to determine the limit value and it was kept at a constant current  
86 density of 100 μA cm<sup>-2</sup>, for each polarization (3 hours charge and 3 hours discharge). Li/LiFePO<sub>4</sub> cells based  
87 on lithium metal anode, LiFePO<sub>4</sub> cathode (80 wt% active material (LiFePO<sub>4</sub>), 10 wt% binder (PVDF) and  
88 10 wt% conductive agent (Super P)) and the as-prepared electrolytes were assembled in an argon-filled  
89 glove box. The LiFePO<sub>4</sub> loading was 2.4 ~ 3.0 g cm<sup>-2</sup> for each cathode. The charge-discharge performance,  
90 rate capacity and cycle life of the cells were assessed on the battery testing system (BAT-750B) from 2.5 V  
91 to 4.0 V at 25 °C and 60 °C, respectively, and a 30-second rest time was set between each cycle. At 1st, 25th,  
92 50th, 75th, and 100th cycles, the cells were dismantled from the fixture and connected to CH Instruments  
93 6116E for AC impedance measurements. Afterwards, they were mounted back on the fixture again for  
94 continuous charge-discharge cycling and the cells were disassembled after cycling to observe the surface  
95 morphology of lithium anode.

97 **Table S1.** The composition of the prepared electrolytes.

| Electrolyte                | Weight (mg) |           |        |        |        |
|----------------------------|-------------|-----------|--------|--------|--------|
|                            | Prepolymer  |           |        | LiTFSI | PEGDEM |
|                            | VIm-TFSI    | XVIm-TFSI | PEGMEA |        |        |
| <b>Control Sample, P-0</b> | -           | -         | 200    | 120    | 160    |
| <b>P-series</b>            |             |           |        |        |        |
| <b>P-10</b>                | 20          | -         | 180    | 120    | 160    |
| <b>P-15</b>                | 30          | -         | 170    | 120    | 160    |
| <b>P-20</b>                | 40          | -         | 160    | 120    | 160    |
| <b>P-25</b>                | 50          | -         | 150    | 120    | 160    |
| <b>XP-series</b>           |             |           |        |        |        |
| <b>XP-10</b>               | -           | 20        | 180    | 120    | 160    |
| <b>XP-15</b>               | -           | 30        | 170    | 120    | 160    |
| <b>XP-20</b>               | -           | 40        | 160    | 120    | 160    |
| <b>XP-25</b>               | -           | 50        | 150    | 120    | 160    |

98 \*Initiator (AIBN): 3 wt% of the prepolymers.

99

100 **Table S2.** Ionic conductivities, discharge capacities, compressive elastic modulus, and 5 % weight loss  
 101 temperatures of P-20 and XP-20.

| Sample | Ionic Conductivity<br>(log (S/cm)) |       | Discharge Capacity at<br>25°C (mAh/g) |      | Compressive Elastic<br>Moduli (Mpa) |             | 5% Weight<br>Loss<br>Temperature<br>(T <sub>d</sub> 5%) (°C) |
|--------|------------------------------------|-------|---------------------------------------|------|-------------------------------------|-------------|--------------------------------------------------------------|
|        | 25°C                               | 60°C  | 0.1C                                  | 1C   | 5 % strain                          | 15 % strain |                                                              |
| P-20   | -3.53                              | -3.04 | 168.2                                 | 70.0 | 0.006                               | 0.010       | 239                                                          |
| XP-20  | -3.63                              | -3.10 | 164.0                                 | 98.6 | 0.032                               | 0.052       | 279                                                          |

102

103

104

105 **Table S3.** The corresponding simulated impedance parameters of Li/LiFePO<sub>4</sub> cells with P-20 and XP-20 in  
106 an equivalent circuit.

| <b>Sample</b> | <b>Cycle</b> | <b>R<sub>b</sub> (Ω)</b> | <b>R<sub>t</sub> (Ω)</b> |
|---------------|--------------|--------------------------|--------------------------|
| <b>P-20</b>   | 1st          | 110                      | 1320                     |
|               | 25th         | 100                      | 1810                     |
|               | 50th         | 120                      | 2390                     |
|               | 75th         | 120                      | 1580                     |
|               | 100th        | 100                      | 1860                     |
| <b>XP-20</b>  | 1st          | 150                      | 730                      |
|               | 25th         | 130                      | 1230                     |
|               | 50th         | 150                      | 1480                     |
|               | 75th         | 120                      | 1780                     |
|               | 100th        | 100                      | 2040                     |

107  
108

**Table S4.** Summary of cycle performance of Li/LiFePO<sub>4</sub> cells with other reported polymer electrolytes.

| Polymer Electrolyte Composition                                                      | Cycle Number | Discharge Capacity (Cathode Material: LiFePO <sub>4</sub> ) | Ref.      |
|--------------------------------------------------------------------------------------|--------------|-------------------------------------------------------------|-----------|
| XP-20 PILs-co-PEG/PEGDME/LiTFSI                                                      | 150          | 151 mAh g <sup>-1</sup> / 0.2 C (25°C)                      | This work |
|                                                                                      | 35           | 118 mAh g <sup>-1</sup> / 0.5 C (25°C)                      |           |
|                                                                                      | 180          | 149 mAh g <sup>-1</sup> / 0.2 C (60°C)                      |           |
|                                                                                      | 100          | 150 mAh g <sup>-1</sup> / 0.5 C (60°C)                      |           |
| Pyrrolidinium-based PILs/IL/LiTFSI                                                   | 70           | 150 mAh g <sup>-1</sup> / 0.05 C (40°C)                     | 1         |
| Pyrrolidinium-based PILs/SN/LiTFSI                                                   | 40           | 150 mAh g <sup>-1</sup> / 0.1 C (25°C)                      | 2         |
|                                                                                      | 10, 10, 10   | 150, 130, 120 mAh g <sup>-1</sup> / 0.1, 0.5, 1 C (25°C)    |           |
| Pyrrolidinium-based PILs/PEG/LiTFSI                                                  | 70           | 140 mAh g <sup>-1</sup> / 0.2 C (80°C)                      | 3         |
| Pyrrolidinium-based PILs/IL+EC/LiTFSI                                                | -            | 130 mAh g <sup>-1</sup> / 1 C (22°C)                        | 4         |
| Guanidinium-based PILs/IL/LiTFSI                                                     | 100          | 130 mAh g <sup>-1</sup> / 0.1 C (80°C)                      | 5         |
| Guanidinium-based PILs/IL/LiTFSI                                                     | 70           | 115 mAh g <sup>-1</sup> / 0.1 C (80°C)                      | 6         |
| Tetraalkylammonium-based PILs/IL/LiTFSI                                              | 130          | 125 mAh g <sup>-1</sup> / 0.1 C (60°C)                      | 7         |
| Tetraalkylammonium-based PILs/IL/LiTFSI                                              | 50           | 135 mAh g <sup>-1</sup> / 0.1 C (60°C)                      | 8         |
| Tetraalkylammonium-based PILs/IL/LiTFSI                                              | 100          | 155 mAh g <sup>-1</sup> / 0.1 C (60°C)                      | 9         |
| Tetraalkylammonium-based PILs/IL/LiTFSI                                              | 100          | 140 mAh g <sup>-1</sup> / 0.1 C (60°C)                      | 10        |
| Pyridinium-based PILs/IL/LiTFSI                                                      | 250          | 140 mAh g <sup>-1</sup> / 0.1 C (25°C)                      | 11        |
| Imidazolium-based PILs/IL/LiTFSI                                                     | 50           | 160 mAh g <sup>-1</sup> / 0.1 C (40°C)                      | 12        |
| Imidazolium-based PILs/IL/LiTFSI                                                     | 15           | 130 mAh g <sup>-1</sup> / 0.1 C (25°C)                      | 13        |
| Imidazolium-based PILs-co-PEG/PEG/LiTFSI                                             | 50           | 110 mAh g <sup>-1</sup> / 0.2 C (55°C)                      | 14        |
| TEGDMA/PEG/LiTFSI                                                                    | 100          | 138 mAh g <sup>-1</sup> / 0.1 C (25°C)                      | 15        |
| INSPM-60/LiTFSI                                                                      | 200          | 131 mAh g <sup>-1</sup> / 0.1 C (60°C)                      | 16        |
| LiPCSI/PEG                                                                           | 80           | 120 mAh g <sup>-1</sup> / 0.1 C (60°C)                      | 17        |
| LiSTFSI-co-PEG/Ethylene Carbonate                                                    | 100          | 138 mAh g <sup>-1</sup> / 0.2 C (50°C)                      | 18        |
|                                                                                      | 100          | 126 mAh g <sup>-1</sup> / 0.5 C (50°C)                      |           |
| (PPEGMEA-b-PS) <sub>2</sub> /CH <sub>3</sub> O-PEG-PC/fumed SiO <sub>2</sub> /LiTFSI | 100          | 138 mAh g <sup>-1</sup> / 0.2 C (28°C)                      | 19        |
|                                                                                      | 100          | 111 mAh g <sup>-1</sup> / 0.5 C (28°C)                      |           |
| PEG-CCH/LiTFSI                                                                       | 100          | 138 mAh g <sup>-1</sup> / 0.1 C (60°C)                      | 20        |

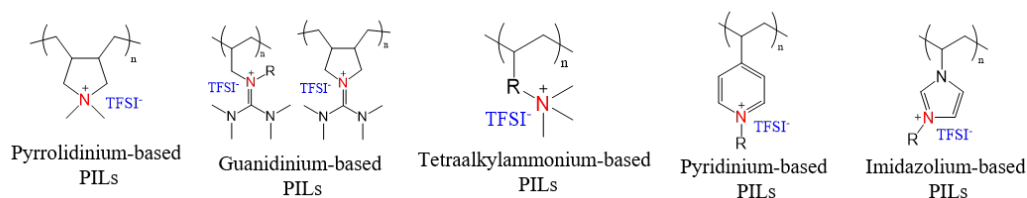



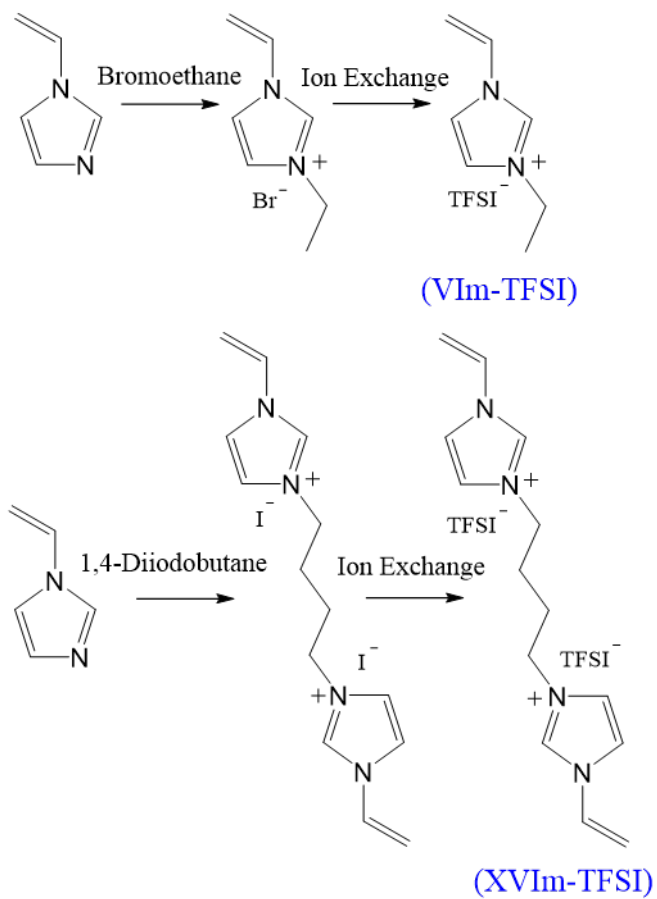

112

113

**Figure S1.** Synthesis of prepolymers, VIm-TFSI and XVIm-TFSI.

114

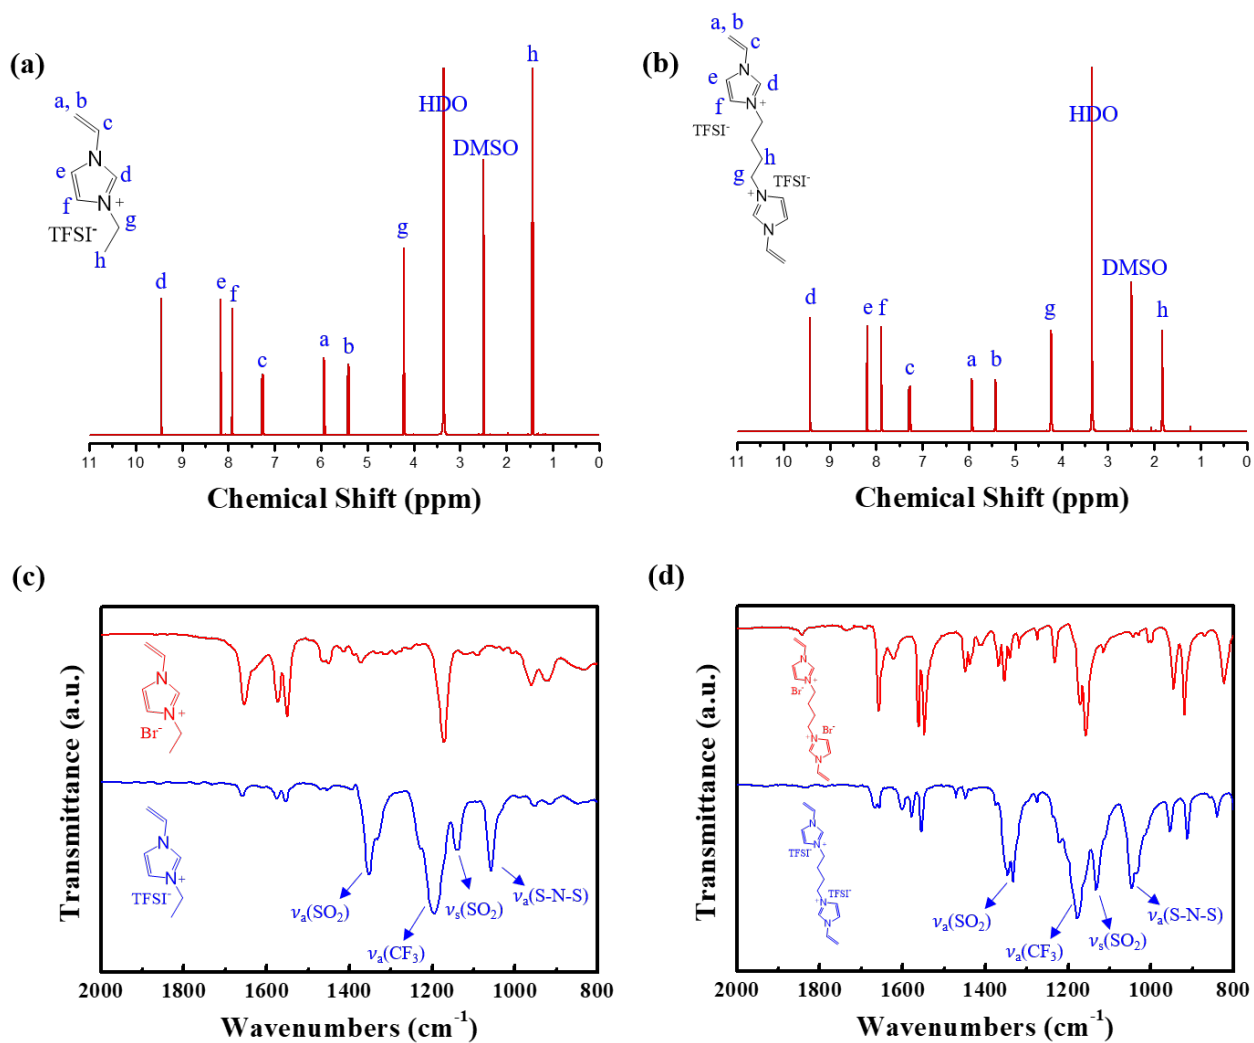

115

116

**Figure S2.** <sup>1</sup>H NMR spectra of the prepolymer (a) VIm-TFSI and (b) XVIm-TFSI. FT-IR spectra of the

117

prepolymer (c) VIm-TFSI and (d) XVIm-TFSI before and after ion exchange.

118

**(a) Appearance**

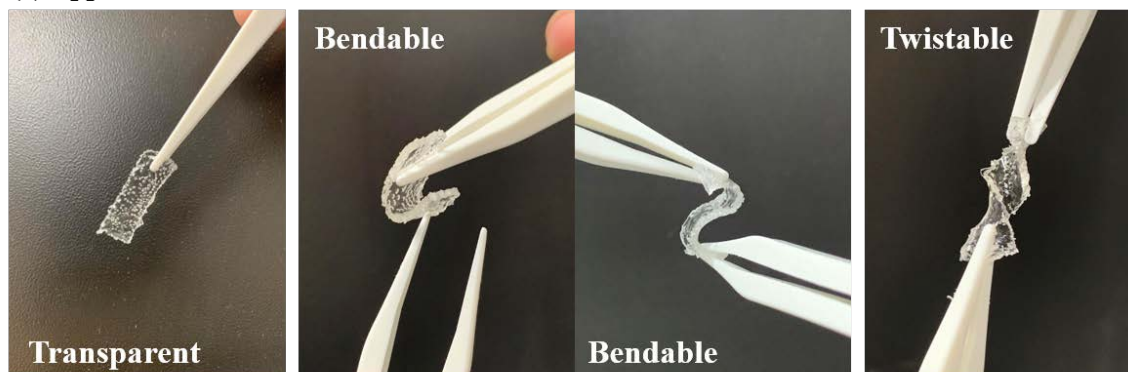

**(b)~(g) SEM**

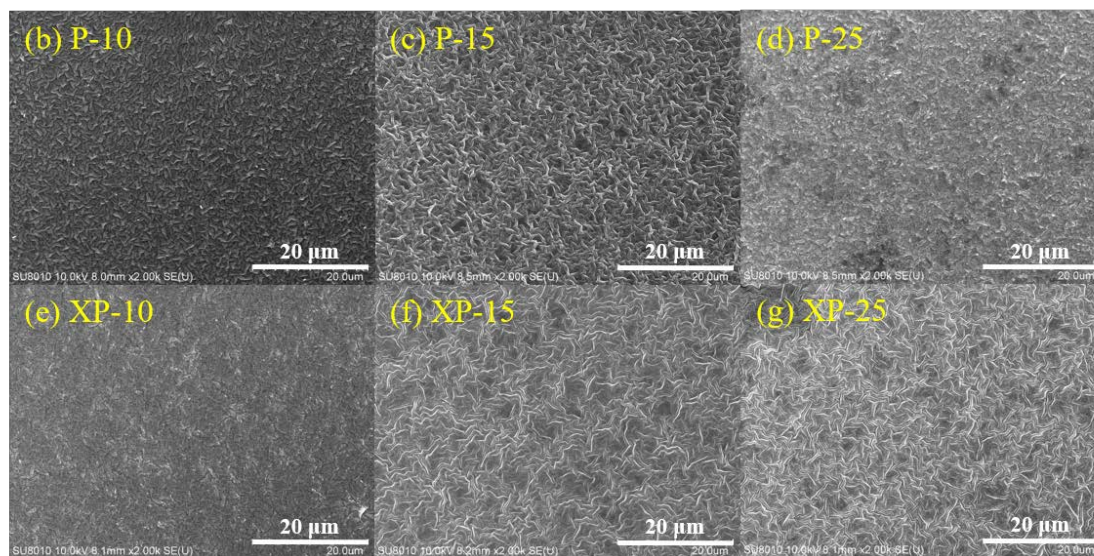

119

120

**Figure S3.** (a) Digital photographs of XP-20. (b)-(f) SEM photos of the electrolytes.

121

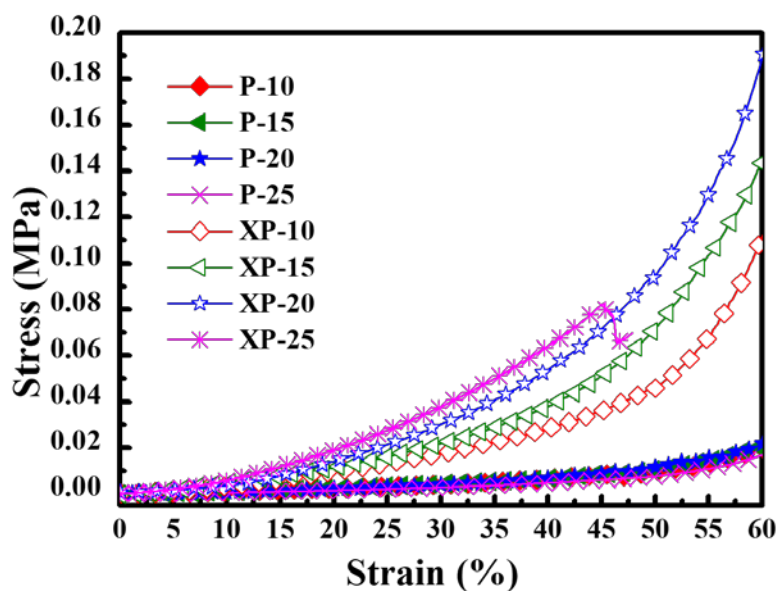

| Sample | Compressive Elastic Moduli (Mpa) |            |
|--------|----------------------------------|------------|
|        | 5% strain                        | 15% strain |
| P-10   | 0.006                            | 0.010      |
| P-15   | 0.006                            | 0.010      |
| P-20   | 0.006                            | 0.010      |
| P-25   | 0.003                            | 0.007      |
| XP-10  | 0.022                            | 0.043      |
| XP-15  | 0.032                            | 0.052      |
| XP-20  | 0.034                            | 0.053      |
| XP-25  | 0.041                            | 0.079      |

122

123 **Figure S4.** Compressive stress-strain curves (cylindrical sample, 10.0 mm diameter × 5.0 mm thickness)

124 and the calculated compressive elastic moduli of the electrolytes. Note that the XP-25 sample breaks at a

125 strain of 45 %.

126

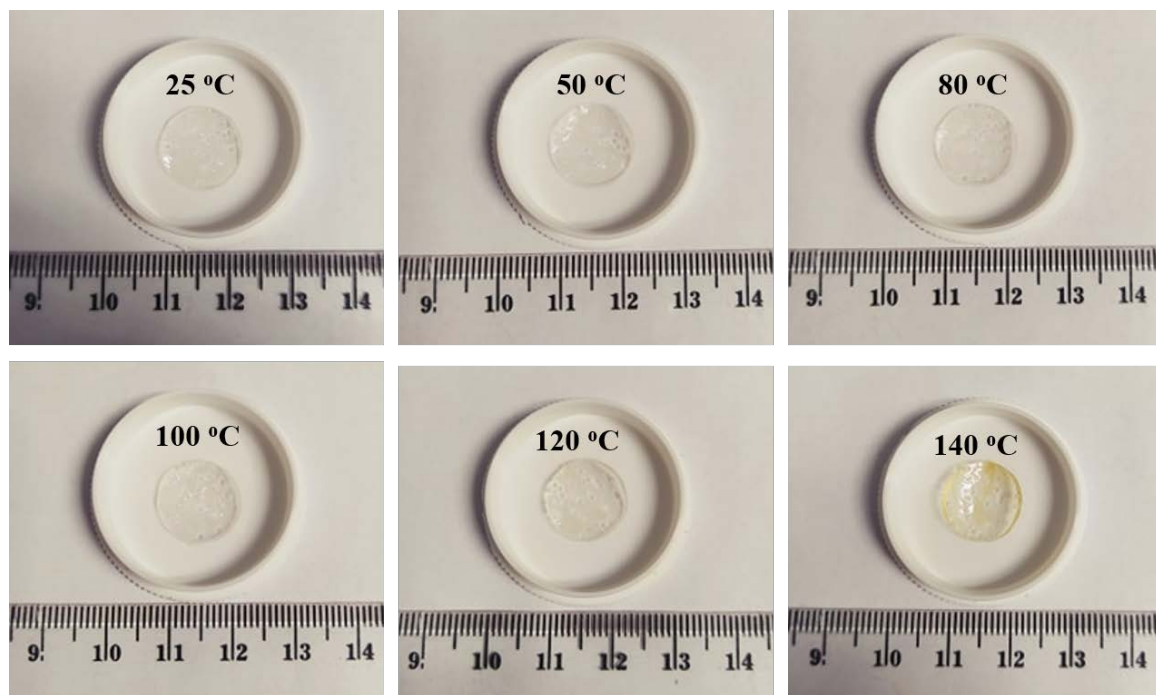

127

128

**Figure S5.** Photographs of a XP-20 sample after been heated to various temperatures (Each temperature was

129

maintained for 2 hrs.).

130

131

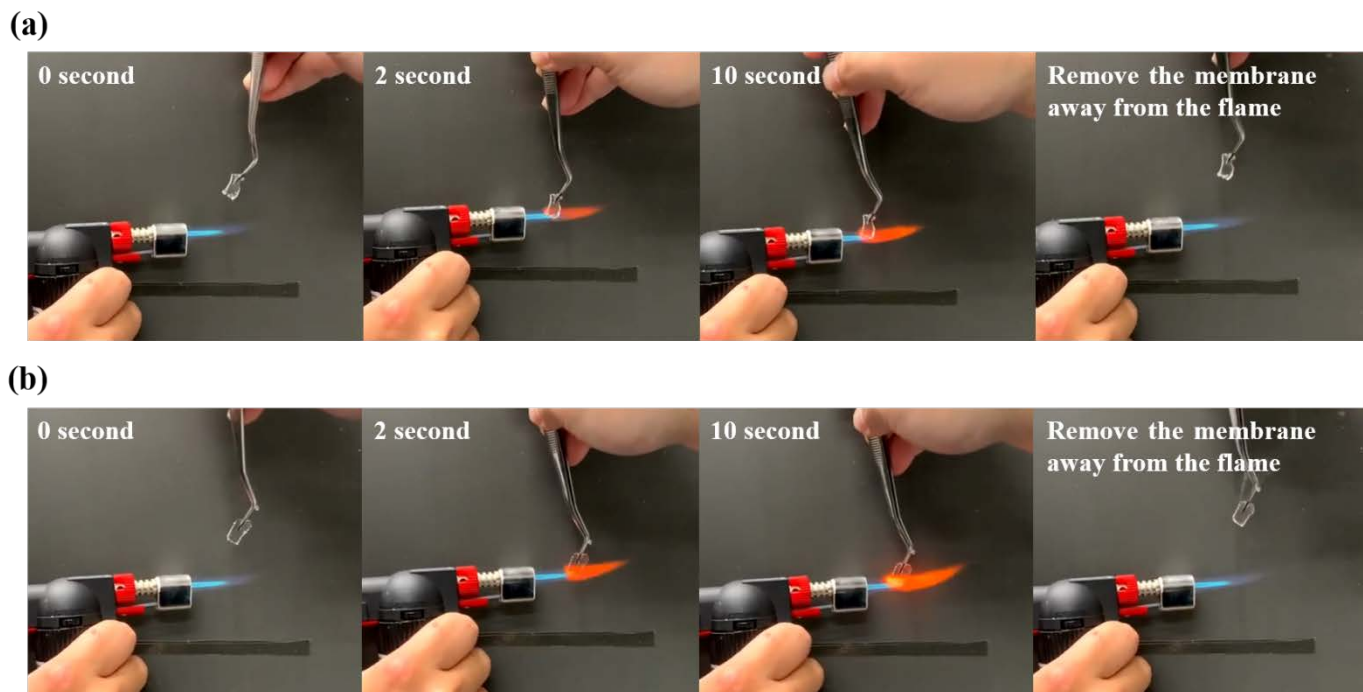

132  
133 **Figure S6.** Combustion test for (a) P-20 and (b) XP-20 as a function of time. At 0 second, the flame started  
134 to ignite the membrane. After 2 seconds, both membranes started burning from the rim. After 10 seconds,  
135 remove the membrane away from the flame, and the membrane was self-extinguished immediately.

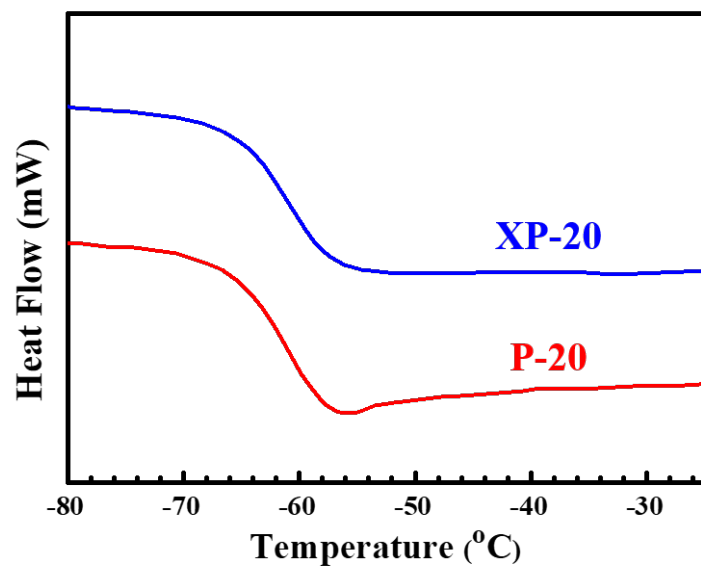

138

139 **Figure S7.** DSC curves of P-20 and XP-20. The inflection point was taken as  $T_g$ .

140

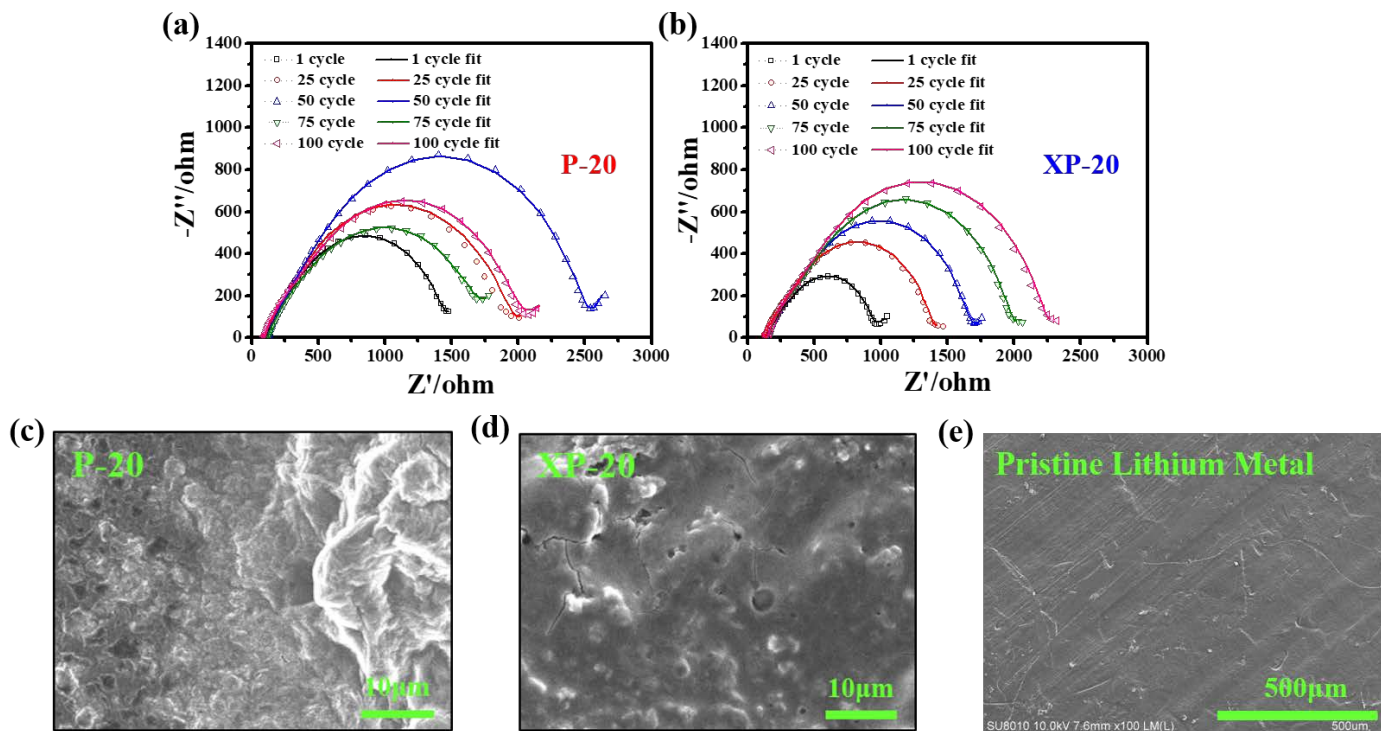

141

142

143

144

145

146

**Figure S8.** Electrochemical impedance spectra (EIS) of the Li/LiFePO<sub>4</sub> cells with (a) P-20 and (b) XP-20 after 1 cycle, 25 cycles, 50 cycles, 75 cycles and 100 cycles at 0.2 C rate at 25 °C. SEM photos of the lithium anode surface obtained from Li/LiFePO<sub>4</sub> cells with (c) P-20 and (d) XP-20 after cycling. (e) SEM images of the fresh lithium surface.



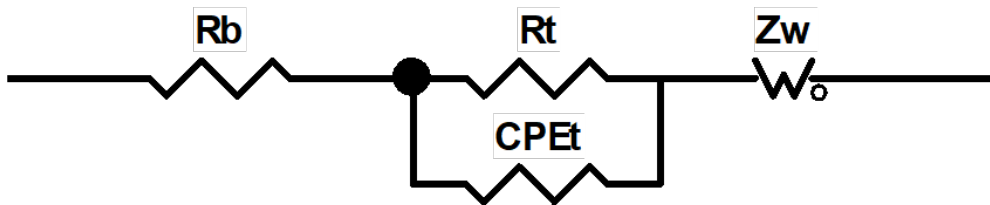

$R_b$ : Bulk resistance of the cell.

$R_t$ : Resistance of solid electrolyte interphase (SEI) ( $R_{sei}$ ) and resistance of charge transfer at the interface between SEI and active materials ( $R_{ct}$ ).

$Z_w$ : Warburg impedance.

147

148 **Figure S9.** The equivalent circuit for the experimental EIS.

149

150

151

- 153 1. G. B. Appetecchi, G. T. Kim, M. Montanina, M. Carewska, R. Marcilla, D. Mecerreyes and I. De  
154 Meatza, *J Power Sources*, 2010, **195**, 3668-3675.
- 155 2. X. W. Li, Z. X. Zhang, S. J. Li, L. Yang and S. Hirano, *J Power Sources*, 2016, **307**, 678-683.
- 156 3. S. J. Li, Z. X. Zhang, K. H. Yang and L. Yang, *Chemelectrochem*, 2018, **5**, 328-334.
- 157 4. M. Safa, A. Chamaani, N. Chawla and B. El-Zahab, *Electrochim Acta*, 2016, **213**, 587-593.
- 158 5. M. T. Li, L. Yang, S. H. Fang, S. M. Dong, S. Hirano and K. Tachibana, *J Power Sources*, 2011, **196**,  
159 8662-8668.
- 160 6. M. T. Li, L. Yang, S. H. Fang, S. M. Dong, S. Hirano and K. Tachibana, *Polym Int*, 2012, **61**,  
161 259-264.
- 162 7. M. T. Li, B. L. Yang, L. Wang, Y. Zhang, Z. Zhang, S. H. Fang and Z. X. Zhang, *J Membrane Sci*,  
163 2013, **447**, 222-227.
- 164 8. M. T. Li, L. Wang, B. L. Yang, T. T. Du and Y. Zhang, *Electrochim Acta*, 2014, **123**, 296-302.
- 165 9. Y. Zhou, B. Wang, Y. Yang, R. Li, Y. Wang, N. Zhou, J. Shen and Y. Zhou, *Reactive and*  
166 *Functional Polymers*, 2019, **145**, 104375.
- 167 10. N. Zhou, Y. Wang, Y. Zhou, J. Shen, Y. Zhou and Y. Yang, *Electrochim Acta*, 2019, **301**, 284-293.
- 168 11. X. L. Tian, Y. K. Yi, P. Yang, P. Liu, L. Qu, M. T. Li, Y. S. Hu and B. L. Yang, *Acs Appl Mater*  
169 *Inter*, 2019, **11**, 4001-4010.
- 170 12. K. Yin, Z. X. Zhang, X. W. Li, L. Yang, K. Tachibana and S. I. Hirano, *Journal of Materials*  
171 *Chemistry A*, 2015, **3**, 170-178.
- 172 13. P. F. Zhang, M. T. Li, B. L. Yang, Y. X. Fang, X. G. Jiang, G. M. Veith, X. G. Sun and S. Dai, *Adv*  
173 *Mater*, 2015, **27**, 8088-8094.
- 174 14. Y. H. Li, Z. J. Sun, L. Shi, S. Y. Lu, Z. H. Sun, Y. C. Shi, H. Wu, Y. F. Zhang and S. J. Ding, *Chem*  
175 *Eng J*, 2019, **375**, 121925.
- 176 15. Y. H. Zhang, W. Lu, L. N. Cong, J. Liu, L. Q. Sun, A. Mauger, C. M. Julien, H. M. Xie and J. Liu, *J*  
177 *Power Sources*, 2019, **420**, 63-72.
- 178 16. Y. F. Tong, H. L. Lyu, Y. Z. Xu, B. P. Thapaliya, P. P. Li, X. G. Sun and S. Dai, *Journal of*  
179 *Materials Chemistry A*, 2018, **6**, 14847-14855.
- 180 17. H. Y. Yuan, J. Y. Luan, Z. L. Yang, J. Zhang, Y. F. Wu, Z. G. Lu and H. T. Liu, *Acs Appl Mater*  
181 *Inter*, 2020, **12**, 7249-7256.
- 182 18. G. M. Luo, B. Yuan, T. Y. Guan, F. Y. Cheng, W. Q. Zhang and J. Chen, *Acs Applied Energy*  
183 *Materials*, 2019, **2**, 3028-3034.
- 184 19. T. Y. Guan, S. J. Qian, Y. K. Guo, F. Y. Cheng, W. Q. Zhang and J. Chen, *Acs Materials Letters*,  
185 2019, **1**, 606-612.
- 186 20. Y. H. Jo, S. Q. Li, C. Zuo, Y. Zhang, H. H. Gan, S. B. Li, L. P. Yu, D. He, X. L. Xie and Z. G. Xue,  
187 *Macromolecules*, 2020, **53**, 1024-1032.
- 188
